# Supplementary material for: Coordination polymer-derived mesoporous Co3O4 hollow nanospheres for high-performance lithium-ions batteries
Source: Royal Society of Chemistry journal article supplement (doi:10.1039/c6ra09608e), 2016-01-01
Supplement: c6ra09608e1.pdf [file c6ra09608e1.pdf]

# Supporting information

## Coordination Polymer-Derived Mesoporous Co<sub>3</sub>O<sub>4</sub> Hollow Nanospheres for High-performance Lithium-ions Batteries

Renbing Wu,<sup>a,b</sup> Xukun Qian,<sup>c</sup> Adrian Wing-Keung Law,<sup>a,d</sup> and Kun Zhou,<sup>\*a,b</sup>

<sup>a</sup> *Environmental Process Modeling Center, Nanyang Environment and Water Research Institute, Nanyang Technological University, 1 Clean Tech Loop, Singapore 637141, Singapore*

<sup>b</sup> *School of Mechanical and Aerospace Engineering, Nanyang Technological University, Singapore 639798, Singapore*

<sup>c</sup> *School of Engineering and Design, Lishui University, Lishui 323000, China*

<sup>d</sup> *School of Civil and Environmental Engineering, Nanyang Technological University, 50 Nanyang Avenue, Singapore 639798, Singapore*

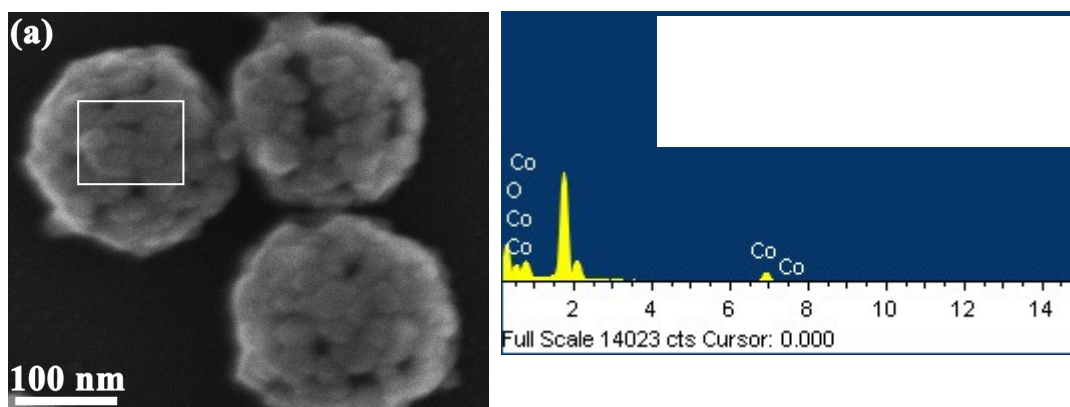

**Fig. S1.** (a) FESEM image of  $\text{Co}_3\text{O}_4$  hollow nanospheres and (b) EDS spectrum recorded from the area indicated by a white square in (a).

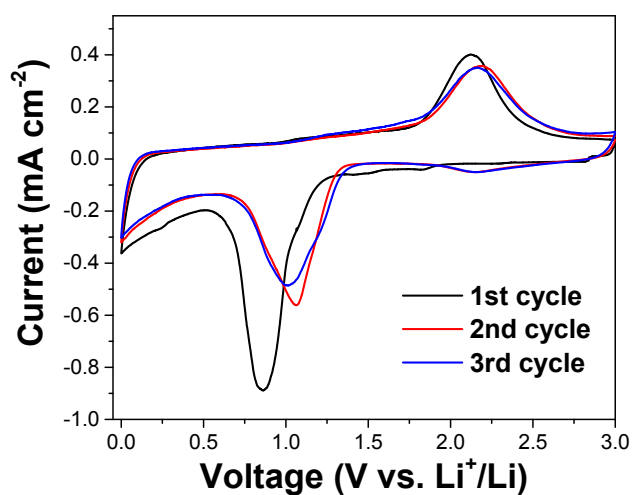

**Fig. S2.** The first three consecutive CV curves of the electrode made from porous  $\text{Co}_3\text{O}_4$  nanospheres.

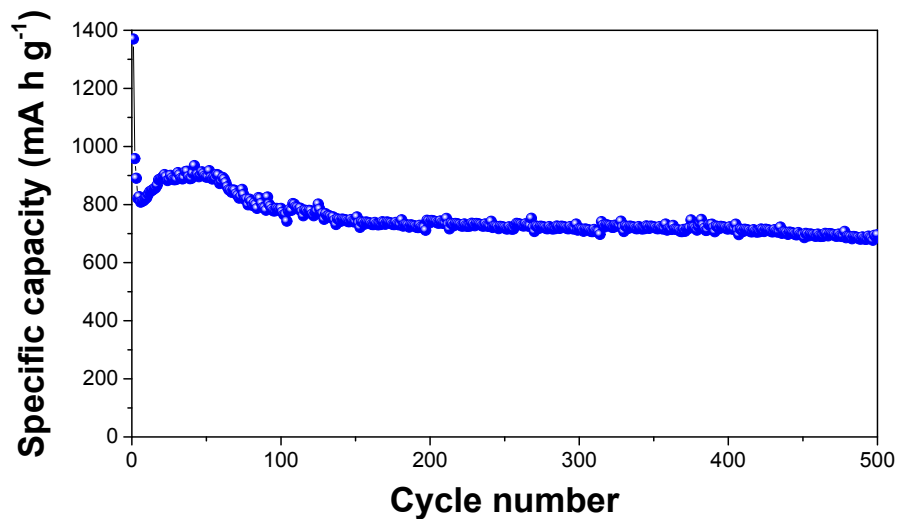

**Fig. S3.** Cycling performance of the  $\text{Co}_3\text{O}_4$  hollow nanospheres electrode at the current density of  $1 \text{ A g}^{-1}$

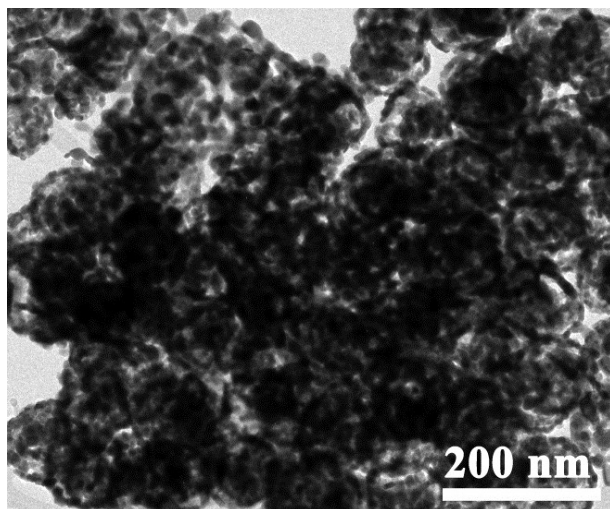

**Fig. S4.** TEM image of the  $\text{Co}_3\text{O}_4$  hollow spheres electrodes after 100 cycles at the current density of  $0.1 \text{ A g}^{-1}$ .
